# Supplementary material for: Synthesis of polyhedral gold nanostars as surface-enhanced Raman spectroscopy substrates for measurement of thiram in peach juice
Source: Royal Society of Chemistry journal article supplement (doi:10.1039/c9an00687g), 2019-01-01
Supplement: c9an00687g1.pdf [file c9an00687g1.pdf]

## Appendix A

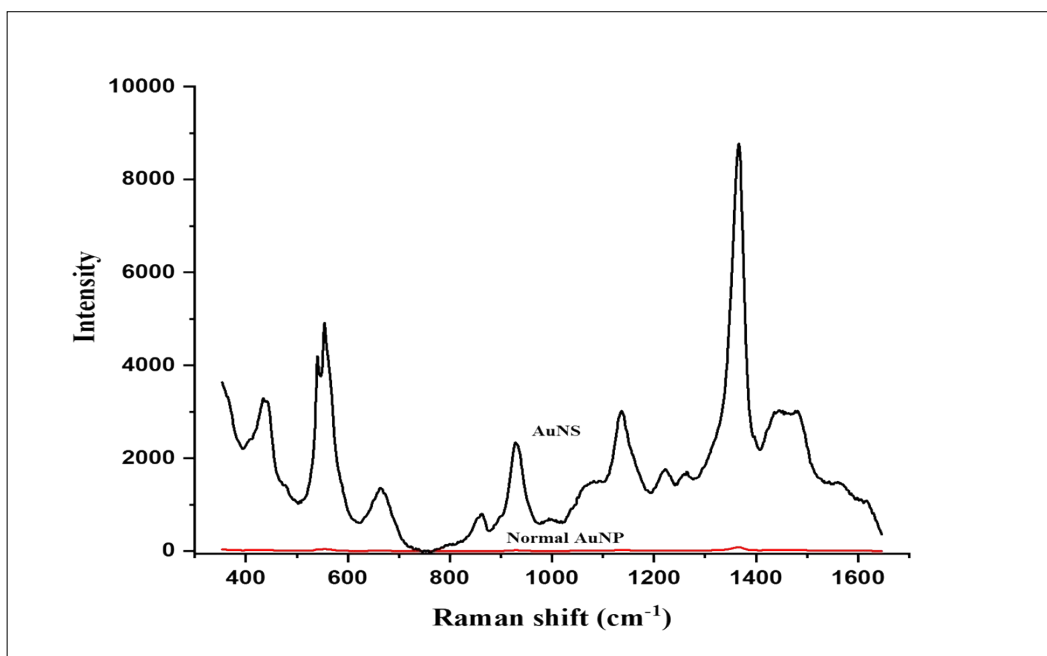

Figure S1. The comparison of SERS intensity between gold nanostars (AuNS) and normal gold nanoparticles (AuNP).

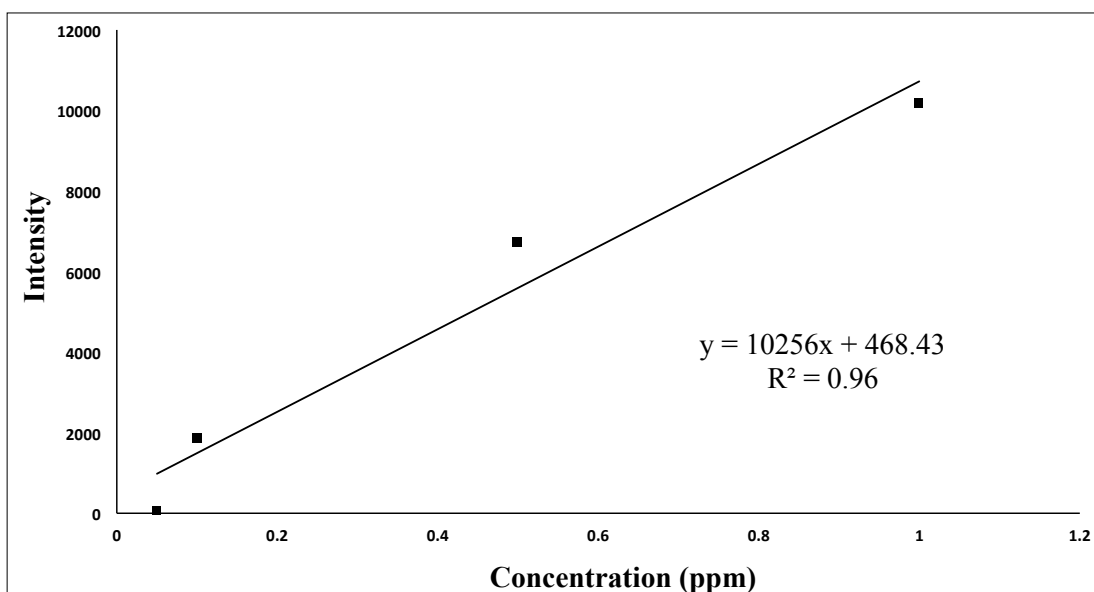

Figure S2. The calibration plot of the Raman peak intensity at 1372  $\text{cm}^{-1}$  and different concentrations of thiram solution.
